# **Trophic dynamics of scleractinian corals: A stable isotope evidence**

Pascale Tremblay<sup>1,2,\*</sup>, Jean François Maguer<sup>3</sup>, Renaud Grover<sup>1,†</sup>, and Christine Ferrier-Pagès<sup>1,†</sup>

<sup>1</sup>Centre Scientifique de Monaco, 8 quai Antoine 1<sup>er</sup>, MC-98000 Monaco

<sup>2</sup>Present address: Département de biologie, chimie et géographie, Université du Québec à Rimouski, 300 allée des Ursulines, Rimouski QC, G5L 3A1 Canada

<sup>3</sup>LEMAR - UMR 6539 UBO/CNRS/IRD, Institut Universitaire Européen de la Mer, Place Nicolas Copernic, 29280 Plouzané, France

\*Author for correspondence (pascale\_tremblay@globetrotter.net)

†These authors have equally contributed to the work.

## SUMMARY

Reef-building corals form symbioses with dinoflagellates from the diverse genus *Symbiodinium*. This symbiotic association has developed adaptations to acquire and share nutrients, which are essential for its survival and growth in nutrient-poor tropical waters. The host is thus able to prey on a wide range of organic food sources (heterotrophic nutrition) while the symbionts acquire most of the inorganic nutrients (autotrophic nutrition). Nutrient fluxes between the two partners remain however unclear, especially concerning heterotrophically-acquired carbon (C) and nitrogen (N). We combined physiological measurements and pulse-chase isotopic labeling of heterotrophic C and N as well as autotrophic C to track nutrient fluxes in two coral species, *Stylophora pistillata* and *Turbinaria reniformis*, in symbiosis with *Symbiodinium* clades A, and C-D respectively. We showed a rapid acquisition, exchange and a long-term retention of heterotrophic nutrients within the symbiosis, whereas autotrophic nutrients were rapidly used to meet immediate metabolic needs. In addition, there was a higher retention of heterotrophic nitrogen compared to carbon, in agreement with the idea that tropical corals are nitrogen-limited. Finally, a coupling between auto- and heterotrophy was observed in the species *S. pistillata*, with a higher acquisition and retention of heterotrophic nutrient under low irradiance to compensate for a 50% reduction in autotrophic nutrient acquisition and translocation. Conversely, *T. reniformis* conserved an equivalent heterotrophic nutrient acquisition at both light levels, because this coral species did not significantly reduced its rates of gross photosynthesis and autotrophic carbon acquisition between the two irradiances. These experiments advance the current understanding of the nutrient exchanges between the two partners of a symbiotic association, providing evidence of the complexity of the host-symbiont relationship.

Key-words: autotrophy, carbon, heterotrophy, irradiance, isotopic labeling, nitrogen, *Stylophora pistillata*, *Symbiodinium*, symbiosis, *Turbinaria reniformis*.

## INTRODUCTION

Nitrogen (N) is an essential structural and functional component of all living organisms (Lehninger et al., 1993). It is one of the building blocks of amino acids and proteins, which are the main components of tissue, enzymes and hormones, essential for cell metabolism. Scleractinian symbiotic corals, which are the main reef builders in the oceans, thrive in oligotrophic tropical waters where nutrients, and N sources in particular, are scarce (D'Elia and Wiebe, 1990; Szmant, 1997). Corals have thus developed adaptations to this poor environment, by living in symbiosis with dinoflagellates of the genus *Symbiodinium* sp. On one hand, symbionts translocate to their host most of their carbon-rich photosynthetic products (photosynthates), which are mainly used by the host for respiration (Falkowski et al., 1984; Tremblay et al., 2012). On the other hand, symbionts enable corals to take up dissolved inorganic nitrogen and phosphorus from seawater (Muscatine and D'Elia, 1978; Grover et al., 2002; Godinot et al., 2009), in addition to recycling the nitrogenous waste products of the coral host (Cook, 1983; Smith and Douglas, 1987). Corals are also animals, and can acquire nutrients through the capture of a whole range of prey (Sebens et al., 1996; Houlbrèque et al., 2004; Lai et al., 2013; Leal et al., 2014).

In tropical reefs, concentrations of inorganic nutrients are usually in the nanomolar range (D'Elia and Wiebe, 1990; Davis and Jones, 1997; Shyka and Sebens, 2000), and coral symbionts cannot always exploit them (D'Elia and Webb, 1977; Shyka, 2000). Prey capture by the host (i.e. planktivory or heterotrophy) can thus be an important source of N (Bythell, 1988; Anthony, 1999; Ferrier-Pagès et al., 2003), and carbon (C) for the symbiosis, depending on the environmental conditions (Houlbrèque and Ferrier-Pagès, 2009). Heterotrophy was shown to enhance the metabolism of several coral species under non-stressful conditions (Houlbrèque and Ferrier-Pagès, 2009), and increase coral resilience and resistance to stress (Grottoli et al., 2004; Grottoli et al., 2006; Rodrigues and Grottoli, 2007; Ferrier-Pagès et al., 2010; Edmunds, 2011). Host nutritional state also affects symbiont metabolism as well as their acquisition and translocation of inorganic nutrients (D'Elia and Cook, 1988; Cook et al., 1992; McAuley and Cook, 1994; Davy and Cook, 2001; Morar et al., 2011). Although we have now a better knowledge of the importance of heterotrophy in corals (Houlbrèque and Ferrier-Pagès, 2009), we still know very little about the more complex aspects of metabolic interplay between cnidarians-algal partners. The ultimate metabolic destinations of nutrients, as well as the flux of metabolites between the symbiotic partners are still unclear.

Among the open questions, the symbiont capacity for heterotrophic nutrient acquisition, i.e. the partitioning of these nutrients between the host and symbionts, are still a matter of debate. While particulate N was rapidly (few hours) observed both in the host and symbionts of the temperate corals *Oculina arbuscula* and *Oculina diffusa* (Piniak et al., 2003; Piniak and Lipschultz, 2004) or the sea anemone *Anthopleura aureoradiata* (Morar et al., 2011), no N enrichment from detritic particulate matter was measured in the symbionts of four other tropical scleractinian corals, *Siderastrea radians*, *Montastrea franksi*, *Diploria strigosa* and *Madracis mirabilis* (Mills et al., 2004). The traditional view of the N conservation hypothesis (Rees and Ellard, 1989) is that N is recycled between the host and the symbionts to limit losses (Rahav et al., 1989; Falkowski et al., 1993), but there are few direct evidences for such recycling. Also, the fate of heterotrophic C within the coral symbiosis has been studied only twice (Szmant-Froelich, 1981; Hughes et al., 2010), and needs to be further investigated to have a better knowledge of the heterotrophic nutrient requirements of each partner of the symbiosis. Finally, it is still poorly known whether symbiont activity has any influence on the heterotrophic nutrient acquisition and partitioning, or in other word, whether the heterotrophic acquisition of C and N depends on the autotrophic acquisition of C by the symbionts. On one hand, heterotrophy was suggested to increase in few scleractinian coral species under low irradiance levels (deep or turbid waters) to compensate for the decrease in symbiont photosynthesis and autotrophic nutrient supply (Muscattine et al., 1989; Anthony and Fabricius, 2000; Tremblay et al., 2014). On the other hand, increased heterotrophy was strongly associated with a higher symbiont translocation rates in sea anemones (Leal et al., in press). Therefore, how *Symbiodinium* activity influences the nutritional plasticity of a cnidarian-dinoflagellate symbiosis remains unclear.

Since organic feeding is an important nutritional source for corals, there is a need to expand our understanding on how corals use the heterotrophic nutrients depending on the environmental conditions or depending on the symbionts activity. In this study, we assessed the partitioning of heterotrophic nitrogen (HN) and carbon (HC) between the symbionts and host of the scleractinian branching coral *Stylophora pistillata* (Esper 1797) and the foliose coral *Turbinaria reniformis* Bernard 1896, under two irradiance levels. Photosynthetic performance and autotrophic carbon (AC) translocation by the symbionts to the host were studied in parallel, to link the two flows of energy within the symbiosis. The two coral species investigated present a long-term association with *Symbiodinium* clade A for *S. pistillata* and clades C and D for *T. reniformis*, suggesting that the partnership is the most efficient under our environmental conditions. They also have similar high grazing rates

(Tremblay et al., 2011; Tremblay et al., 2014), and rely on heterotrophy in their natural environment, either because of turbid waters for *T. reniformis* (Veron, 2000; Anthony, 2006), or because it thrives in deep environments for *S. pistillata* (Muscatine et al., 1989; Mass et al., 2010). The final aims were to assess (1) the fate of HC and HN within the symbiotic associations of *S. pistillata* and *T. reniformis* and the capacity of the symbionts to quickly acquire these nutrients; (2) whether rates of both auto- and heterotrophic nutrient acquisition is holobiont (host-symbionts) dependent; (3) whether the acquisition of heterotrophic nutrients is dependent on photosynthesis, or in other words, whether the acquisition depends on the autotrophic acquisition of C by the symbionts?

## RESULTS

### Physiological parameters

At each irradiance level, the areal concentrations of symbionts and chlorophyll were three times higher in *S. pistillata* than *T. reniformis* (Fig. 1A,B; Table S1). *Stylophora pistillata* had also significantly higher calcification, gross photosynthesis, and host respiration rates per skeletal surface area compared to *T. reniformis* (Fig. 1C,D,E; Table S1). This latter species had however a protein content twice higher (ca. 5.0 mg proteins cm<sup>-2</sup> at both irradiance levels) than *S. pistillata* (ca. 2.5 mg proteins cm<sup>-2</sup>; Table S1), indicating a different use of resources. Concerning symbiont cells, their individual rates of gross photosynthesis and respiration were higher in *T. reniformis* than *S. pistillata*, although their chlorophyll content was similar in both species (Tables 1, S2).

Under low irradiance, *S. pistillata* significantly increased symbiont concentration, chlorophyll concentration per skeletal surface area (Fig. 1A,B; Table S1) and per symbiont cell (Tables 1, S2) as well as the areal symbiont respiration (Fig. 1F; Table S1). Conversely, it decreased rates of gross photosynthesis per skeletal surface area (Fig. 1D, Table S1) or symbiont cell (Tables 1, S2), symbiont respiration per symbiont cell (Tables 1, S2), host respiration and calcification (Fig. 1C,E; Table S1). In *T. reniformis*, chlorophyll concentration per skeletal surface area (Fig. 1B, Table S1) and per symbiont cell (Tables 1, S2) was also increased, whereas calcification, host respiration (Fig. 1C,E; Table S1) as well as gross photosynthesis and symbiont respiration per symbiont cell (Tables 1, S2) were significantly lower.

### Allocation of heterotrophic nitrogen and carbon

The heterotrophic carbon (HC) and nitrogen (HN) incorporation rates ( $^{HC}\rho$  and  $^{HN}\rho$ , respectively) measured after one day of feeding show the short-term exchanges of heterotrophic nutrients between the host ( $^{HC}\rho_H$  and  $^{HN}\rho_H$ , Fig. 2A,B) and the symbionts ( $^{HC}\rho_S$  and  $^{HN}\rho_S$ , Fig. 2C,D), and the loss of nutrients from the symbiotic association after 48 h. The incorporation rates measured after one week of feeding (Fig. 2E,F) rather show the long-term distribution of nutrients within the symbiotic association. Although the HC and HN incorporation rates were generally much higher in *S. pistillata* than *T. reniformis*, they followed the same patterns in both species (Fig. 2). The HC:HN ratios were equivalent in both species. They varied between 2.6 and 3.4 in the coral hosts and between 1.5 and 3.0 in the symbionts under low and high irradiance, respectively (Table 2). Moreover, HC and HN incorporation rates in the host tissue of *S. pistillata* and *T. reniformis* were proportional ( $R^2 > 0.8$  for both nutrients) to the symbiont concentrations (Fig. 3A,B), as well as to the incorporation rate of autotrophic carbon (AC) in the symbionts (Fig. 3C,D), both in the short- and long-term experiments.

Concerning *S. pistillata*, HC and HN incorporation rates were higher in the host tissue than in the symbionts, both in the short- and long-term experiments (Fig. 2). Nutrients were however rapidly translocated and/or available to the symbionts, which were labeled 4 h after feeding. Irradiance significantly affected incorporation rates (Fig. 2; Table 2). Under low irradiance, the amount of HN and HC incorporated in each fraction remained constant between the 4 and 48 h (Fig. 2A,B,D; Table 2), while the incorporated HC decreased by half with time under high irradiance (Fig. 2A,C; Table 2). After 48 h,  $2.7 \mu\text{g HC cm}^{-2} \text{ h}^{-1}$  and  $1.2 \mu\text{g HN cm}^{-2} \text{ h}^{-1}$  were retained within the symbiotic association under low irradiance, against only about half of these amounts under high irradiance ( $1.7 \mu\text{g HC cm}^{-2} \text{ h}^{-1}$  and  $0.6 \mu\text{g HN cm}^{-2} \text{ h}^{-1}$ ; Fig. 2A,B,C,D). HC and HN incorporation rates calculated after one week at both irradiance levels were proportional to the incubation length and in the same range than the rates obtained after one day ( $3.3 \mu\text{g HC cm}^{-2} \text{ h}^{-1}$  and  $1.4 \mu\text{g HN cm}^{-2} \text{ h}^{-1}$  retained under low irradiance, against only half of these amounts under high irradiance, Fig. 2E,F). These results suggest that nutrients were not lost from the symbiotic association after one week and that there was a constant pattern of nutrient allocation between the partners. Although the total amount of HC and HN incorporated within the symbiotic association changed with time and irradiance, the nutrient allocation between the host and symbionts remained constant (62% to

88% retained in the host and 12% to 38% retained in the symbionts; Table S3). The highest retention of HC per symbiont cell occurred under high irradiance (Tables 1, S2).

*Turbinaria reniformis* presented rates of HC and HN acquisition and retention rates in the symbiotic association twice to six times lower than those measured for *S. pistillata*. Indeed, after 48 h or 7 days, 0.4 to 0.8  $\mu\text{g HC cm}^{-2} \text{ h}^{-1}$  and 0.2 to 0.4  $\mu\text{g HN cm}^{-2} \text{ h}^{-1}$  were retained depending on the irradiance level considered (Fig. 2; Table 2). Irradiance had no effect on the total amount of HN and HC incorporated in the host. However, the amount of HC incorporated in symbiont per surface area (Fig. 2C; Table 2) and per symbiont cell (Tables 1, S2) was higher under high irradiance. Concerning the allocation of nutrients within the symbiotic association, 49% to 77% was retained in the coral host versus 23% to 51% in the symbionts (Table S3).

### Allocation of autotrophic carbon

The autotrophic carbon (AC) budget, as calculated with the equations presented in Tremblay et al. (2012; 2014) for the two coral species and the two irradiance levels are presented in Figure 4. Only the final model is presented in this paper, to supplement the heterotrophic allocation of nutrients. The detailed results are presented in the supplemental material (Figs S1, S2). There was a significant interaction between growth irradiance and species on the fate of the autotrophically-acquired C (Table 3). In *S. pistillata*, high irradiance significantly increased the amount of C fixed by the symbionts and translocated to the host ( $T_S$ ) as well as the amount of AC incorporated by host tissue ( $^{AC}\rho_H$ ) and lost by symbiotic association ( $C_L$ ) after 48h (Fig. 4A,B, Table 3). Conversely, irradiance had no effect on most autotrophic parameters in *T. reniformis* (Fig. 4C,D).

At both irradiances, after 48 h, the amount of AC incorporated in the symbionts ( $^{AC}\rho_S$ ) was higher in *S. pistillata* (from 1.7 to 2.3  $\mu\text{g AC cm}^{-2} \text{ h}^{-1}$ ) than in *T. reniformis* (from 0.9 to 1.4  $\mu\text{g AC cm}^{-2} \text{ h}^{-1}$ ; Fig. 4; Table 3; Tukey's test  $P < 0.05$ ). The same pattern was observed for the host tissue ( $^{AC}\rho_H$ , Fig. 4; Table 3), because the total amount of C translocated after 48 h was also higher in *S. pistillata* (Fig. 4; Table 3; Tukey's test  $P < 0.0001$ ). It indeed supplied, depending on the irradiance level, between 6.7 and 16.9  $\mu\text{g C cm}^{-2} \text{ h}^{-1}$ , against only 3.7 and 5.9  $\mu\text{g AC cm}^{-2} \text{ h}^{-1}$  in *T. reniformis* (Fig. 4). The percentage of carbon translocation was however equivalent for both coral species under low irradiance (51-52%, Fig. 4A,C; Table 3; Tukey's test  $P = 0.9442$ ), but remained higher in *S. pistillata* than *T. reniformis* under high irradiance (79% versus 60%, Fig. 4B,D; Table 3; Tukey's test  $P < 0.001$ ). The

amount of AC lost ( $C_L$ ) in the form of symbiont and host respiration was generally twice higher in *S. pistillata* than *T. reniformis* (Fig. 4; Table 3; Tukey's test  $P < 0.01$ ), although the percentage was equivalent between the two coral species (Fig. 4; Table 3; Tukey's test  $P > 0.05$ ). Finally, the amount of AC lost in the form of particulate (POC) and dissolved (DOC) organic carbon ( $^{AC}\rho_{POC}$  and  $^{AC}\rho_{DOC}$ ) was negligible, compared to the amount respired, for both coral species under low irradiance ( $t$ -test, d.f. = 7,  $P > 0.05$ ). It was much higher ( $t$ -test, d.f. = 7,  $P < 0.01$ ), both in term of percentage or total amount of AC lost for *S. pistillata* than *T. reniformis* under high irradiance (Fig. 4B,D; Table 3).

## DISCUSSION

The dual  $^{13}C/^{15}N$ -labeling of the coral food clearly demonstrated that there was a rapid acquisition, exchange and long-term retention of heterotrophic nutrients (both C and N) by host and symbionts of *S. pistillata* and *T. reniformis*, while autotrophic products were mainly respired and released as mucus in the surrounding water. Heterotrophic nitrogen (HN) was also preferentially retained over heterotrophic carbon (HC). Comparison of the nutrient acquisition in *S. pistillata* and *T. reniformis* showed that the amount of heterotrophic nutrients retained in the host tissue was holobiont dependent and also positively correlated to the symbiont concentration or the amount of autotrophic carbon (AC) retained in symbionts. Finally, there was a coupling between auto- and heterotrophy in the species *S. pistillata*. Indeed heterotrophic nutrient acquisition and retention were higher under low irradiance, to compensate for a reduced autotrophic input and to maintain maximal growth rates.

Although the two coral species were maintained under the same conditions of irradiance and heterotrophic feeding prior and during the experiment, and presented equivalent feeding rates (Tremblay et al., 2011; Tremblay et al., 2014), symbiont concentration was twice higher in *S. pistillata* than *T. reniformis*, leading this former species to achieve higher rates of calcification and photosynthesis per skeletal surface area. *Stylophora pistillata* also presented higher rates of auto- and heterotrophic nutrient acquisition and/or assimilation in the host tissue, in agreement with its higher metabolism. The host, the symbiont, or most probably the synergistic effect of both partners (Goulet et al., 2005) might have dictated the metabolic differences observed between the two species. For example, *T. reniformis* presented lower growth rates as well as higher protein content and metabolic rates compared to *S. pistillata*, and might have exhibited higher protein turnover rates (Gates and Edmunds, 1999). A different light environment inside the host tissue



(Wangpraseurt et al., 2012; 2014), clade-specific metabolic demands (Leal et al., in press), or growth rates, might have led to differences in symbiont concentration. Significant genotypic differences were observed in the rates of nutrient acquisition, retention and translocation per cell (Table 1) between *Symbiodinium* of each coral species (Cantin et al., 2009; Baker et al., 2013). Overall, compared to *S. pistillata*, symbionts of *T. reniformis* had a lower concentration, and also presented, for each irradiance, higher gross photosynthesis and respiration rates per cell, as well as higher incorporation rates of AC and HC. These measurements are in agreement with the observation that a high metabolic demand per cell usually impairs high symbiont concentration (Wooldridge, 2013). In turn, a smaller concentration in *T. reniformis* avoided self-shading and increased the amount of light reaching each symbiont, promoting photosynthesis (Wangpraseurt et al., 2014). Overall, the host-symbiont differences can have induced large intrinsic metabolic differences between the two coral species (Gates and Edmunds, 1999), which might have affected energy fluxes within the symbiosis.

Despite these differences, heterotrophic nutrients (HC and HN) were rapidly shared between the host and the symbionts in both coral species, with large bidirectional flows between the symbiotic partners. HC and HN were first obtained by the animal host through prey capture, and acquired within 4 h by the symbionts, from the coelenteric digestion or direct translocation, as already observed in *O. arbuscula*, *O. diffusa*, *Montipora capitata* and *Porites compressa* (Piniak et al., 2003; Piniak and Lipschultz, 2004; Hughes et al., 2010). The re-translocation of heterotrophic nutrients from the symbionts to the host has been observed only once in *O. diffusa* (Piniak and Lipschultz, 2004), but is confirmed in this study, under low irradiance (Fig. 2; Table S2). Indeed, while HC incorporation in *S. pistillata* host increased from 77% to 86% (+ 9%) between 4 and 48 h, and to 88% (+ 2%) after seven days, a parallel and corresponding decrease was observed in the symbionts, from 23% to 14% (– 9%) between 4 h and 48 h and to 12% (– 2%) after seven days. The same pattern was observed for HN signal of *S. pistillata*. In *T. reniformis*, HN was first translocated from the host to the symbionts between 4 and 48 h, and re-translocated to the host after seven days. HN incorporation rates thus decreased in the host tissue from 64% to 49% (– 15%) between 4 h and 48 h and re-increased to 62% (+ 13%) after seven days, while the contrary was observed in the symbionts. Overall these observations suggest that in both species, nutrients were recycled between the partners, certainly to be incorporated into molecules of interest. These observations confirm in situ measurements of stable isotope signature and lipid composition of the tissue of red sea coral species, and which have suggested a high efficiency

of carbon recycling between the symbiotic partners (Alamaru et al., 2009). Over the long term, symbionts retained between 12% and 44% of the total HC and HN. These values are comparable to those previously estimated with  $^{14}\text{C}$  for symbionts of *Astrangia danae* (Szmant-Froelich, 1981), and hydra (Cook, 1972) and with  $^{15}\text{N}$  for symbionts of *O. arbuscula* (Piniak et al., 2003). We can however notice that the amount of HN acquired per symbiont cell was equivalent for both coral species and irradiance levels, and remained relatively low ( $0.06$  to  $0.12 \times 10^{-6} \mu\text{g HN cell}^{-1} \text{ h}^{-1}$ ) compared to HC incorporation rates, which might explain the discrepancy observed in the literature concerning the symbiont capacity to acquire heterotrophic nutrients (Piniak et al., 2003; Mills et al., 2004). In addition, the fate of HN within the symbiotic association, which is shared both by the host and symbionts, is different from the fate of the dissolved inorganic nitrogen (DIN) which is mainly kept by the symbionts for their own use and development (Grover et al., 2002; 2003). This might explain why DIN tends to disrupt the symbiosis at high concentrations (Wiedenmann et al., 2013), while HN tends to improve the corals' health and metabolism (Grottoli et al., 2006; Ferrier-Pagès et al., 2010). Also, compared to the uptake rates of natural concentrations of DIN by the algae, 2 h of feeding per day brings, in *S. pistillata* 10 times more nitrogen to the symbiotic association.

There was a long-term retention of heterotrophic nutrients (HC and HN) within the symbiosis, conversely to photosynthates (AC), which were used to meet immediate metabolic demands. The amounts of HN, but also HC, remaining in the symbiotic associations after one week of feeding were indeed equivalent to those measured after 48 h of a single day of feeding, while more than 65% of photosynthates were lost within two days as respiration, POC and DOC (Fig. 4). Such food partitioning has only been reported once in corals (Hughes et al., 2010) and in a sea anemone (Bachar et al., 2007). However, all together, these studies highlight a different cycling of auto- and heterotrophic carbon between the components of marine anthozoan symbioses and the importance of heterotrophic nutrient as building blocks or long-term source of energy for these symbioses. The ratios of HC to HN incorporated were equivalent in both species, and lower than the one of the *A. salina* prey, suggesting that HN was preferentially retained in coral tissue compared to HC. This is in agreement with the idea that tropical corals should favor the acquisition and conservation of nitrogen because of the N-poor diet of the translocated algal photosynthates. Although HN was preferred over HC, the rates of HC retention in the host tissue and/or symbionts ( $^{HC}\rho_H$  and  $^{HC}\rho_s$ , Fig. 2) were in the same range, or higher than those measured for AC ( $^{AC}\rho_H$  and  $^{AC}\rho_s$ , Fig. 4), confirming that

the two carbon sources have different nutritional values.

A coupling between auto- and heterotrophy was also observed in the species *S. pistillata*, which presented a significant difference in symbiont and chlorophyll concentrations as well as rates of photosynthesis and carbon acquisition between high and low irradiance. Heterotrophic nutrient acquisition and retention were significantly higher under low irradiance (Fig. 2), to compensate for a 50% reduction in autotrophic nutrient acquisition and translocation and to keep maximal rates of calcification as well as the same carbon budget in all conditions (Fig. 4): the sum of the HC incorporated in host tissue at each irradiance level (2.3 and 1.2  $\mu\text{g HC cm}^{-2} \text{ h}^{-1}$  at low and high irradiance, respectively), with the AC respired by the host (4.9 and 6.2  $\mu\text{g C cm}^{-2} \text{ h}^{-1}$ ) and incorporated in the host tissue (2.1 and 3.1  $\mu\text{g AC cm}^{-2} \text{ h}^{-1}$ ) gave an equivalent carbon budget at both irradiance levels after 48 h. A shift from auto- to heterotrophy was also noticed in *S. pistillata* colonies sampled along a depth gradient in the Red Sea (Alamaru et al., 2009), suggesting that this species indeed shows a great plasticity in the acquisition of nutrients. A very recent paper (Leal et al., in press) performed with sea anemones associated with different *Symbiodinium* clades found the contrary, that higher autotrophy (in terms of total carbon translocation) was strongly associated with increased heterotrophy. This observation is not supported by our results, although we observed a significant relationship between symbiont concentration and the amount of heterotrophic nutrients remaining in host tissue (Fig. 3A,B). This positive association may be due to several non-mutually exclusive reasons: (1) food supply during the five weeks of acclimation to the experimental conditions has enhanced symbiont concentration in host tissue differently according to the coral and symbiont species and/or environmental conditions (clade A in symbiosis with *S. pistillata* might for example had a higher growth compared to clades C and D in symbiosis with *T. reniformis*); (2) a high symbiont concentration in coral tissue has a higher metabolic demand (Wooldridge, 2009), and has driven a higher heterotrophy; (3) a high symbiont concentration, and thus an increased autotrophic nutrient availability to the host have helped supporting the metabolically demanding heterotrophic processes; (4) increased heterotrophic contribution is critical to the assimilation of photosynthetic carbon into host biomass.

In conclusion, this study provides a comprehensive picture of the trophic ecology of the coral-dinoflagellate symbiosis, and particularly of the nutrient exchanges between the two partners. It provides evidence of the complexity of the host-symbiont relationship, and shows that the acquisition and allocation of nutrients depends on the host and symbiont combination. The association between *S. pistillata* and *Symbiodinium* clade A, rapidly modulated its

mixotrophic nutrition, and shifted from autotrophy to heterotrophy to conserve an equivalent nutritional state and maintain high rates of calcification. The association between *T. reniformis* and *Symbiodinium* clades C and D had a different trophic ecology, since it conserved the same auto- and heterotrophic nutrient acquisition at the two irradiances investigated. Understanding the coral trophic ecology is especially important in the context of bleaching events, as not all stable host-dinoflagellate symbioses have the same trophic functioning and are thus not equally nutritionally advantageous. For species like *S. pistillata*, their resistance to a stress impairing symbiont photosynthesis will be strongly dependant on the abundance and health of the zooplankton community in the water column. This study has also shown that the cycling of auto- and heterotrophic carbon between the components of the holobiont is very different, and that the nature of this difference can vary between holobionts and environments. Nonetheless, heterotrophy is an important process for the acquisition of nutrients, especially nitrogen, and the build up of the coral biomass, and may explain the particular resistance and/or resilience of some coral species to stress.

## MATERIALS AND METHODS

### Experimental design

Three large colonies of two species of scleractinian corals, originating from the Red Sea and maintained in the aquaria of the Centre Scientifique de Monaco, were used: *S. pistillata* (suborder *Astrocoeniina*) containing *Symbiodinium* clade A, and *T. reniformis* (suborder *Dendrophylliina*) containing clades C and D on the same colony. *Symbiodinium* clades were identified using partial chloroplast large subunit (23S)-rDNA sequences (Santos et al., 2002). A total of 80 nubbins per species (26 to 27 nubbins per colony) was prepared by cutting the apical branches of *S. pistillata* or portions of *T. reniformis*. They were then equally divided into eight tanks of 20 L (three to four nubbins per colony, species and tank) and cultured for four weeks until tissue entirely covered the skeleton. Tanks were maintained in an open flow system (renewal rate of 10 L h<sup>-1</sup>), with seawater containing low levels of inorganic and organic nutrients (Ferrier-Pagès et al., 1998), under an irradiance level of 120  $\mu\text{mol photons m}^{-2} \text{ s}^{-1}$  (12 h light: 12 h dark photoperiod), and at a constant temperature of 25.0  $\pm$  0.5°C. After these first four weeks, irradiance was increased in four of the eight tanks to 250  $\mu\text{mol photons m}^{-2} \text{ s}^{-1}$  (hereafter called HI tanks) while the remaining tanks were kept at 120  $\mu\text{mol photons m}^{-2} \text{ s}^{-1}$  (hereafter called LI tanks). Corals were fed twice a week for five weeks with *Artemia salina* nauplii, after which a series of physiological and tracer measurements were made (24 h at least after the last feeding).

### Physiological measurements

Calcification rates were determined for six nubbins per species per irradiance (two nubbins per colony), using the buoyant weight technique (Jokiel et al., 1978; Davies, 1989). Carbon allocation to calcification ( $C_C$ ) was calculated according to the formula:  $C_C = M_{Sk} \times 12/100$ , where  $M_{Sk}$  is the  $\mu\text{g CaCO}_3$  produced and 12/100 is the ratio of molecular masses of C (12) and  $\text{CaCO}_3$  (100). Protein content of the coral tissue was measured on the same nubbins according to Smith et al. (1985) using the BC Assay Kit (Uptima, Interchim, France) after extraction in 1 M NaOH at 90°C for 30 min. The standard curve was established using bovine serum albumin, and the absorbance was read on a spectrofluorometer Xenius (Safas, Monaco).

Rates of respiration ( $R$ ) and net photosynthesis ( $P_n$ ) were assessed on six nubbins per species per irradiance (two per colony) using oxygen respirometry according to Hoogenboom et al. (2010). Temperature was kept constant at  $25.0 \pm 0.5^\circ\text{C}$  and irradiances were equal to 0, 120, and 250  $\mu\text{mol photons m}^{-2} \text{ s}^{-1}$ . Rates of gross photosynthesis ( $P_g$ ) were calculated by adding  $R$  to  $P_n$ . The gross autotrophic carbon (AC) acquisition ( $P_C$ ) during the 12 h light period, and the daily C respired ( $R_C$ ) were calculated for each treatment. For this purpose, oxygen fluxes were converted to C equivalents based on molar weights, as  $P_C = P_g \times 12/PQ$  and  $R_C = R \times 12 \times RQ$  (Anthony and Fabricius, 2000), where  $PQ$  and  $RQ$  are photosynthetic and respiratory quotients equal to 1.1 mol  $\text{O}_2$ :mol C and 0.8 mol C:mol  $\text{O}_2$ , respectively (Muscatine et al., 1981; Gattuso and Jaubert, 1990). After these measurements, samples were frozen for the determination of symbiont and chlorophyll (Chl) concentrations, according to Rodolfo-Metalpa et al. (2006) for symbionts, and Jeffrey and Humphrey (1975) for Chl  $a$  and  $c_2$ . Chl pigments were extracted in 99% acetone at 4°C over 24 h. All data were normalized to the skeletal surface area, which was measured using the wax-dipping technique (Stimson and Kinzie, 1991) or per symbiont cell.

In addition to the above measurements, respiration rates of freshly isolated symbionts ( $R_S$ ) were determined for six nubbins per species per irradiance (two per colony) according to Tremblay et al. (2012; 2014). Host respiration ( $R_H$ ) was obtained by subtracting  $R_S$  from  $R_C$ .

### Allocation of heterotrophic nitrogen and carbon

The heterotrophic carbon (HC) and nitrogen (HN) incorporation in the symbionts and coral host was obtained using  $^{13}\text{C}/^{15}\text{N}$ -labeled *Artemia salina* prey. For this purpose, a large batch of the microalgae *Dunaliella* sp. was grown in a Conway medium enriched with 2 mM of  $\text{NaH}^{13}\text{CO}_3$  (98 atom %  $^{13}\text{C}$ , #372382, Sigma-Aldrich, St-Louis, MO, USA) and 1 mM of

$^{15}\text{NH}_4\text{Cl}$  (98 atom %  $^{15}\text{N}$ , #299251, Sigma-Aldrich, St-Louis, MO, USA). After being hatched, a large batch of *A. salina* nauplii was grown for two days in the  $^{13}\text{C}/^{15}\text{N}$ -labeled culture of *Dunaliella* sp. *Artemia salina* were then isolated by filtration on a 20  $\mu\text{m}$  mesh, divided into equal portions and frozen at  $-20^\circ\text{C}$ . A portion of  $^{13}\text{C}/^{15}\text{N}$ -labeled *A. salina* corresponded to  $53.3 \pm 0.8$  mg dry weight (or ca. 300 prey  $\text{L}^{-1}$ ) with  $290 \pm 9$   $\mu\text{g HC mg}^{-1}$  and  $70 \pm 2$   $\mu\text{g HN mg}^{-1}$  (C:N ratio = 4.2). The  $^{13}\text{C}\%$  and  $^{15}\text{N}\%$  of the  $^{13}\text{C}/^{15}\text{N}$ -labeled *A. salina* were equal to  $2.293 \pm 0.001\%$  and  $14.4 \pm 0.2\%$ , respectively, and were measured with a mass spectrometer as described below. Un-enriched *Dunaliella* sp. and *A. salina* were also grown in parallel ( $^{13}\text{C}\% = 1.148 \pm 0.001\%$  and  $^{15}\text{N}\% = 0.468 \pm 0.001\%$ ).

At the end of the five weeks incubation at the two irradiance levels, short and long-term feeding experiments were performed to assess the short- and long-term allocation of nutrients as well as the short- and long terms losses of heterotrophic nutrients from the symbiotic association. For the short-term experiment, nine nubbins per species per irradiance (three per colony) were fed once, during 5 h, with two portions of  $^{13}\text{C}/^{15}\text{N}$ -enriched *A. salina*. Prey digestion has been assessed using visual observations of polyp dissections, as previously performed by several investigators (e.g. Sebens, 1981; Sebens and Johnson, 1991; Houlbrèque et al., 2004; Palardy et al., 2005; Grottoli et al., 2006). These observations showed that no more *A. salina* or pieces of *A. salina* could be observed in the coelenteron of *S. pistillata* or *T. reniformis* 4 h after the feeding trial stopped. Three nubbins per species and irradiance (one per colony) were thus sampled 4 and 48 h after the end of the feeding day and immediately frozen at  $-20^\circ\text{C}$ . The three remaining nubbins per species and per irradiance were kept being fed during six days for 2 h daily (or a total of 17 h) with one portion of  $^{13}\text{C}/^{15}\text{N}$ -enriched *A. salina* and sampled 24 h after the last feeding.

### Allocation of autotrophic carbon

Allocation of AC was performed according to the protocol fully detailed in (Tremblay et al., 2012; 2014). Briefly, nine nubbins per species per irradiance (three nubbins per colony) were incubated in seawater enriched with a final concentration of 0.6 mM  $\text{NaH}^{13}\text{CO}_3$  (98 atom %  $^{13}\text{C}$ , #372382, Sigma-Aldrich, St-Louis, MO, USA), giving a final 23%  $^{13}\text{C}$  enrichment of the incubation medium. After 5 h incubation (pulse), corals were transferred in non-enriched seawater (chase). Three nubbins per species and irradiance (one nubbin per colony) were removed from the incubation medium after the chase intervals of 0, 4 and 48 h and immediately frozen at  $-20^\circ\text{C}$ . Four control nubbins per species and irradiance (one per tank)

were sampled without being labeled with  $^{15}\text{N}/^{13}\text{C}$ -*Artemia* or  $\text{H}^{13}\text{CO}_3^-$ . The samples were treated as described below.

### Sample treatment

For  $^{13}\text{C}$  and  $^{15}\text{N}$  samples, tissue was detached from the skeleton using an air-brush in 0.45  $\mu\text{m}$ -filtered seawater. The slurry was homogenised using a potter tissue grinder, and the host and symbiont fractions were then separated by centrifugation according to Tremblay et al. (2012; 2014). Cross-contaminations were checked in these previous experiments. Samples were flash-frozen in liquid N and freeze-dried until analysis. The  $\%^{13}\text{C}$ , and  $\%^{15}\text{N}$ , as well as the C and N content of the animal tissue and symbionts were determined with a mass spectrometer (Delta Plus, Thermofisher Scientific, Bremen, Germany) coupled via a type III interface with a C/N analyzer (Flash EA, Thermofisher Scientific).

The HC or HN incorporation rates in symbionts ( $^{HC}\rho_s$  and  $^{HN}\rho_s$ , respectively) and coral host ( $^{HC}\rho_H$  and  $^{HN}\rho_H$ , respectively) were calculated using a modification of the equation of Grover et al. (2002), adapted to corals from the equation of Dugdale and Wilkerson (1986). These equations are similar to those used in the AC model (Tremblay et al., 2012; 2014).

$$^{HC}\rho = \frac{(C_{meas} - C_{nat}) \times M_{sample} \times M_C}{(C_{prey} - C_{meas}) \times t_{inc} \times S} \quad (1)$$

or

$$^{HN}\rho = \frac{(N_{meas} - N_{nat}) \times M_{sample} \times M_N}{(N_{prey} - N_{meas}) \times t_{inc} \times S} \quad (2)$$

where  $C_{meas}$  and  $C_{nat}$  or  $N_{meas}$  and  $N_{nat}$  are the percentages of  $^{13}\text{C}$  or  $^{15}\text{N}$  measured in enriched and control samples respectively,  $C_{prey}$  or  $N_{prey}$  are the percent  $^{13}\text{C}$  or  $^{15}\text{N}$  in the prey (2.293% and 14.4%, respectively),  $M_{sample}$  is the mass of the sample (mg),  $M_C$  or  $M_N$  is the C or N content per symbiont or host tissue biomass ( $\mu\text{g mg}^{-1}$ ),  $S$  is the surface area ( $\text{cm}^2$ ),  $t_{inc}$  is the feeding length (5 h for the short-term experiment and 17 h for the long-term experiment). The heterotrophic incorporation rates ( $^{HC}\rho$  or  $^{HN}\rho$ ) are expressed in  $\mu\text{g cm}^{-2} \text{h}^{-1}$  or per cell $^{-1} \text{h}^{-1}$ . The percentage of HC or HN in coral host and symbionts were obtained by dividing the incorporation rates in coral host or symbionts by the total incorporation rates within the symbiotic association.

The AC budget was calculated exactly as described in Tremblay et al. (2012; 2014). These equations allow the calculations of the AC incorporation rates in symbionts ( $^{AC}\rho_s$ ) and



coral host ( ${}^{AC}\rho_H$ ), the percentage of AC remaining ( $C_R$ ) in the symbiotic association, the AC lost ( $C_L = R_C + {}^{AC}\rho_{POC} + {}^{AC}\rho_{DOC}$ ) by this association (as respiration, POC and DOC), and the rates of AC translocation from the symbionts to the host ( $T_S = P_C - {}^{AC}\rho_S - R_S$ ).

### Statistical analysis

All parameters were expressed as mean  $\pm$  standard error of the mean (s.e.m.). Data were checked for normality using a Kolmogorov-Smirnov's test with Lilliefors correction, and for variance homoscedasticity using a Levene's test. When the normality condition was not fulfilled, data were transformed (natural logarithms). The effect of species and irradiance on the physiological parameters was tested using factorial analyses of variance (ANOVA) with two factors (species and irradiance). Significant differences for AC, HC and HN incorporation rates, percentage of AC remaining in the symbiotic association, AC lost and translocation were tested using a repeated measures ANOVA. Colonies were considered as "subjects", while species and irradiance were the between subject factors. The third factor was time over the course of the chase interval, and had two (4 and 48 h) or three (0, 4, and 48 h) levels. When there were significant differences, the analyses were followed by a posteriori testing (Tukey's test). Preliminary partly nested ANOVA were used to test the tank effect. This effect was not significant for any of the parameters so this factor was excluded from analyses (Underwood, 1997). Linear regressions, using standard least-squares techniques, were used to estimate the relationship between mean symbiont concentration or mean incorporation rates of AC in symbionts and mean HC or HN incorporation rates in coral host after 48 h during short-term experiment and during long-term experiment. Differences in the amount of AC lost as respiration, POC and DOC ( $C_L$ ), after 48 h and total respiration ( $R_C$ ) were tested using a *t*-test (d.f. =  $n_{CL} + n_{RC} - 2 = 3 + 6 - 2 = 7$ ). Differences between factors were considered significant for *P*-values < 0.05. Statistics were performed using Systat 13 (Systat Software, Chicago, IL, USA).



## LIST OF SYMBOLS AND ABBREVIATIONS

|                   |                                                                                                             |
|-------------------|-------------------------------------------------------------------------------------------------------------|
| AC                | Autotrophic carbon                                                                                          |
| C                 | Carbon                                                                                                      |
| $C_C$             | Amount of C used by calcification ( $\mu\text{g C cm}^{-2} \text{ h}^{-1}$ )                                |
| Chl               | Chlorophyll                                                                                                 |
| $C_L$             | AC lost ( $\mu\text{g AC cm}^{-2} \text{ h}^{-1}$ or %)                                                     |
| $C_{meas}$        | $^{13}\text{C}$ measured in the sample (%)                                                                  |
| $C_{nat}$         | Natural abundance in $^{13}\text{C}$ in control nubbins (%)                                                 |
| $C_{prey}$        | $^{13}\text{C}$ enrichment in $^{13}\text{C}/^{15}\text{N}$ -labeled <i>A. salina</i> (2.293%)              |
| $C_R$             | Percentage of AC remaining in symbionts or host tissue (%)                                                  |
| HC                | Heterotrophic carbon                                                                                        |
| HN                | Heterotrophic nitrogen                                                                                      |
| $M_C$             | Mass of C per milligram of tissue or symbionts ( $\mu\text{g mg}^{-1}$ )                                    |
| $M_N$             | Mass of N per milligram of tissue or symbionts ( $\mu\text{g mg}^{-1}$ )                                    |
| $M_{sample}$      | Mass of the freeze-dried sample (mg)                                                                        |
| $M_{Sk}$          | Amount of $\text{CaCO}_3$ produced by calcification ( $\mu\text{g CaCO}_3 \text{ cm}^{-2} \text{ h}^{-1}$ ) |
| N                 | Nitrogen                                                                                                    |
| $N_{meas}$        | $^{15}\text{N}$ measured in the sample (%)                                                                  |
| $N_{nat}$         | Natural abundance in $^{15}\text{N}$ in control nubbins (%)                                                 |
| $N_{prey}$        | $^{15}\text{N}$ enrichment in $^{13}\text{C}/^{15}\text{N}$ -labeled <i>A. salina</i> (14.4%)               |
| $P_C$             | Amount of AC fixed by symbionts ( $\mu\text{g AC cm}^{-2} \text{ h}^{-1}$ )                                 |
| $P_g$             | Oxygen produced by gross photosynthesis ( $\mu\text{mol O}_2 \text{ cm}^{-2} \text{ h}^{-1}$ )              |
| $P_n$             | Oxygen produced by net photosynthesis ( $\mu\text{mol O}_2 \text{ cm}^{-2} \text{ h}^{-1}$ )                |
| $PQ$              | Photosynthetic quotient (equal to 1.1 mol $\text{O}_2$ :mol C)                                              |
| $R$               | Oxygen consumed by respiration of holobiont ( $\mu\text{mol O}_2 \text{ cm}^{-2} \text{ h}^{-1}$ )          |
| $R_C$             | Amount of C respired by holobiont ( $\mu\text{g C cm}^{-2} \text{ h}^{-1}$ )                                |
| $R_H$             | Amount of C respired by coral host ( $\mu\text{g C cm}^{-2} \text{ h}^{-1}$ )                               |
| $RQ$              | Respiratory quotient (equal to 0.8 mol $\text{O}_2$ :mol C)                                                 |
| $R_S$             | Amount of AC respired by symbionts ( $\mu\text{g AC cm}^{-2} \text{ h}^{-1}$ )                              |
| S                 | Nubbin surface area ( $\text{cm}^2$ )                                                                       |
| $T_S$             | Amount of AC translocated from symbionts to their host ( $\mu\text{g AC cm}^{-2} \text{ h}^{-1}$ or %)      |
| $t_{inc}$         | Feeding length (5 or 17 h)                                                                                  |
| $^{AC}\rho_{DOC}$ | Amount of AC lost in released dissolved organic carbon ( $\mu\text{g AC cm}^{-2} \text{ h}^{-1}$ )          |
| $^{AC}\rho_H$     | Amount of AC incorporated in the coral host ( $\mu\text{g AC cm}^{-2} \text{ h}^{-1}$ )                     |
| $^{AC}\rho_{POC}$ | Amount of AC lost in released particulate organic carbon ( $\mu\text{g AC cm}^{-2} \text{ h}^{-1}$ )        |

|               |                                                                                         |
|---------------|-----------------------------------------------------------------------------------------|
| $^{AC}\rho_S$ | Amount of AC incorporated in the symbionts ( $\mu\text{g AC cm}^{-2} \text{ h}^{-1}$ )  |
| $^{HC}\rho_H$ | Amount of HC incorporated in the coral host ( $\mu\text{g HC cm}^{-2} \text{ h}^{-1}$ ) |
| $^{HC}\rho_S$ | Amount of HC incorporated in the symbionts ( $\mu\text{g HC cm}^{-2} \text{ h}^{-1}$ )  |
| $^{HN}\rho_H$ | Amount of HN incorporated in the coral host ( $\mu\text{g HN cm}^{-2} \text{ h}^{-1}$ ) |
| $^{HN}\rho_S$ | Amount of HN incorporated in the symbionts ( $\mu\text{g HN cm}^{-2} \text{ h}^{-1}$ )  |

## ACKNOWLEDGEMENTS

We thank V. Leyendecker, C. Rottier and S. Sikorski for laboratory assistance, D. Allemand, Director of the Centre Scientifique de Monaco (CSM), for scientific support, and one anonymous reviewer for helpful comments.

## AUTHOR CONTRIBUTIONS

P.T., J.F.M., R.G. and C.F.P. conceived and designed the experiments; P.T. and J.F.M. performed the experiments; P.T. analyzed the data; P.T., J.F.M., R.G. and C.F.P. wrote the paper.

## COMPETING INTERESTS

No competing interests declared.

## FUNDING

Funding for this project was provided by the CSM, the Institut Universitaire Européen de la Mer and the Natural Sciences and Engineering Research Council of Canada (ES D3 – 378797 – 2009 to P.T.).

## REFERENCES

- Alamaru, A., Loya, Y., Brokovich, E., Yamd, R. and Shemesh, A.** (2009). Carbon and nitrogen utilization in two species of Red Sea corals along a depth gradient: Insights from stable isotope analysis of total organic material and lipids. *Geochimica Cosmochim. Acta* **73**, 5333–5342.
- Anthony, K. R. N.** (1999). Coral suspension feeding on fine particulate matter. *J. Exp. Mar. Biol. Ecol.* **232**, 85-106.
- Anthony, K. R. N.** (2006). Enhanced energy status of corals on coastal, high-turbidity reefs. *Mar. Ecol. Prog. Ser.* **319**, 111-116.

- Anthony, K. R. N. and Fabricius, K. E.** (2000). Shifting roles of heterotrophy and autotrophy in coral energy budgets at variable turbidity. *J. Exp. Mar. Biol. Ecol.* **252**, 221-253.
- Bachar, A., Achituv, Y., Pasternak, Z. and Dubinsky, Z.** (2007). Autotrophy versus heterotrophy: the origin of carbon determines its fate in a symbiotic sea anemone. *J. Exp. Mar. Biol. Ecol.* **349**, 295-298.
- Baker, D. M., Andras, J. P., Jordán-Garza, A. G. and Fogel, M. L.** (2013). Nitrate competition in a coral symbiosis varies with temperature among *Symbiodinium* clades. *ISME J.* **7**, 1248-1251.
- Bythell, J. C.** (1988). A total nitrogen and carbon budget for the elkhorn coral *Acropora palmata* (Lamarck). *Proc. 6th Int. Coral Reef Symp.* **2**, 535-540.
- Cantin, N. E., van Oppen, M. J. H., Willis, B. L., Mieog, J. C. and Negri, A. P.** (2009). Juvenile corals can acquire more carbon from high-performance algal symbionts. *Coral Reefs* **28**, 405-414.
- Cook, C. B.** (1972). Benefit to symbiotic zoochlorella from feeding by green hydra. *Biol. Bull.* **142**, 236-242.
- Cook, C. B.** (1983). Metabolic interchange in algae-invertebrate symbiosis. *Int. Rev. Cytol. (suppl.)* **14**, 177-210.
- Cook, C. B., Muller-Parker, G. and D'Elia, C. F.** (1992). Ammonium enhancement of dark carbon fixation and nitrogen limitation in symbiotic zooxanthellae: effect of feeding and starvation of the sea anemone *Aiptasia pallida*. *Limnol. Oceanogr.* **37**, 131-139.
- D'Elia, C. F. and Webb, L.** (1977). The dissolved nitrogen flux of reef corals. *Proc. 3rd Int. Coral Reef Symp.* **1**, 326-330.
- D'Elia, C. F. and Cook, C. B.** (1988). Methylamine uptake by zooxanthellae-invertebrate symbioses: insights into host ammonium environment and nutrition. *Limnol. Oceanogr.* **33**, 1153-1165.
- D'Elia, C. F. and Wiebe, W. J.** (1990). Biogeochemical nutrient cycles in coral-reef ecosystems. In *Coral reefs. Ecosystems of the world* vol. 25 (ed. Z. Dubinsky), pp. 49-74. Amsterdam: Elsevier.
- Davies, P. S.** (1989). Short-term growth measurements of corals using an accurate buoyant weighing technique. *Mar. Biol.* **101**, 389-395.
- Davis, K. A. and Jones, R. D.** (1997). Diel ammonium fluxes of two Caribbean reef corals, *Porites porites* and *Dichocoenia stokesii*, under non-enrichment conditions. *Proc. 8th Int. Coral Reef Symp.* **1**, 851-854.

- Davy, S. K. and Cook, C. B.** (2001). The relationship between nutritional status and carbon flux in the zooxanthellate sea anemone *Aiptasia pallida*. *Mar. Biol.* **139**, 999-1005.
- Dugdale, R. C. and Wilkerson, F. P.** (1986). The use of  $^{15}\text{N}$  to measure nitrogen uptake in eutrophic oceans; experimental considerations. *Limnol. Oceanogr.* **31**, 637-689.
- Edmunds, P. J.** (2011). Zooplanktivory ameliorates the effects of ocean acidification on the reef coral *Porites* spp. *Limnol. Oceanogr.* **56**, 2402-2410.
- Falkowski, P. G., Dubinsky, Z., Muscatine, L. and Porter, J. W.** (1984). Light and the bioenergetics of a symbiotic coral. *BioScience* **34**, 705-709.
- Falkowski, P. G., Dubinsky, Z., Muscatine, L. and McCloskey, L.** (1993). Population control in symbiotic corals. *BioScience* **43**, 606-611.
- Ferrier-Pagès, C., Witting, J., Tambutté, É. and Sebens, K. P.** (2003). Effect of natural zooplankton feeding on the tissue and skeletal growth of the scleractinian coral *Stylophora pistillata*. *Coral Reefs* **22**, 229-240.
- Ferrier-Pagès, C., Rottier, C., Béraud, É. and Levy, O.** (2010). Experimental assessment of the feeding effort of three scleractinian coral species during a thermal stress: Effect on the rates of photosynthesis. *J. Exp. Mar. Biol. Ecol.* **390**, 118-124.
- Ferrier-Pagès, C., Gattuso, J. P., Cauwet, G., Jaubert, J. and Allemand, D.** (1998). Release of dissolved organic carbon and nitrogen by the zooxanthellate coral *Galaxa fascicularis*. *Mar. Ecol. Prog. Ser.* **172**, 265-274.
- Gates, R. D. and Edmunds, P. J.** (1999). The physiological mechanisms of acclimatization in tropical reef corals. *Amer. Zool.* **39**, 30-43.
- Gattuso, J.-P. and Jaubert, J.** (1990). Effect of light on oxygen and carbon dioxide fluxes and on metabolic quotients measured *in situ* in a zooxanthellate coral. *Limnol. Oceanogr.* **35**, 1796-1804.
- Godinot, C., Ferrier-Pagès, C. and Grover, R.** (2009). Control of phosphate uptake by zooxanthellae and host cells in the scleractinian coral *Stylophora pistillata*. *Limnol. Oceanogr.* **54**, 1627-1633.
- Goulet, T. L., Cook, C. B. and Goulet, D.** (2005). Effect of short-term exposure to elevated temperatures and light levels on photosynthesis of different host-symbiont combinations in the *Aiptasia pallida*/Symbiodinium symbiosis. *Limnol. Oceanogr.* **50**, 1490-1498.
- Grottoli, A. G., Rodrigues, L. J. and Juarez, C.** (2004). Lipids and stable carbon isotopes in two species of Hawaiian corals, *Porites compressa* and *Montipora verrucosa*, following a bleaching event. *Mar. Biol.* **145**, 621-631.

- Grottoli, A. G., Rodrigues, L. J. and Palardy, J. E.** (2006). Heterotrophic plasticity and resilience in bleached corals. *Nature* **440**, 1186-1189.
- Grover, R., Maguer, J. F., Reynaud-Vaganay, S. and Ferrier-Pagès, C.** (2002). Uptake of ammonium by the scleractinian coral *Stylophora pistillata*: Effect of feeding, light, and ammonium concentrations. *Limnol. Oceanogr.* **47**, 782-790.
- Grover, R., Maguer, J. F., Allemand, D. and Ferrier-Pagès, C.** (2003). Nitrate uptake in the scleractinian coral *Stylophora pistillata*. *Limnol. Oceanogr.* **48**, 2266-2274.
- Hoogenboom, M., Béraud, É. and Ferrier-Pagès, C.** (2010). Relationship between symbiont density and photosynthetic carbon acquisition in the temperate coral *Cladocora caespitosa*. *Coral Reefs* **29**, 21-29.
- Houlbrèque, F. and Ferrier-Pagès, C.** (2009). Heterotrophy in tropical scleractinian corals. *Biol. Rev.* **84**, 1-17.
- Houlbrèque, F., Tambutté, É., Richard, C. and Ferrier-Pagès, C.** (2004). Importance of a micro-diet for scleractinian corals. *Mar. Ecol. Prog. Ser.* **282**, 151-160.
- Hughes, A. D., Grottoli, A. G., Pease, T. K. and Matsui, Y.** (2010). Acquisition and assimilation of carbon in non-bleached and bleached corals. *Mar. Ecol. Prog. Ser.* **420**, 91-101.
- Jeffrey, S. W. and Humphrey, G. F.** (1975). New spectrophotometric equations for determining chlorophylls *a*, *b*, *c*<sub>1</sub> and *c*<sub>2</sub> in higher plants, algae and natural phytoplankton. *Biochem. Physiol. Pflanzen* **167**, 191-194.
- Jokiel, R. L., Maragos, J. E. and Franzisket, L.** (1978). Coral growth: buoyant weight technique. In *Coral reefs: research methods, Monogr. Oceanogr. Methodol.*, vol. 5 eds. D. R. Stoddard and R. E. Johannes), pp. 529-542: UNESCO.
- Lai, S., Gillis, L. G., Mueller, C., Bouma, T. J., Guest, J. R., Last, K. S., Ziegler, A. D. and Todd, P. A.** (2013). First experimental evidence of corals feeding on seagrass matter. *Coral Reefs* **32**, 1061-1064.
- Leal, M. C., Ferrier-Pagès, C., Calado, R., Thompson, M. E., Frischer, M. E. and Nejstgaard, J. C.** (2014). Coral feeding on microalgae assessed with molecular trophic markers. *Mol. Ecol.* **23**, 3870-3876.
- Leal, M. C., Hoadley, K., Pettay, D. T., Grajales, A., Calado, R. and Warner, M. E.** (in press). Symbiont type influences trophic plasticity of a model cnidarian-dinoflagellate symbiosis. *J. Exp. Biol.*
- Lehninger, A. L., Nelson, D. L. and Cox, M. M.** (1993). Principles of biochemistry. New York: Worth.

- Mass, T., Kline, D. I., Roopin, M., Veal, C. J., Cohen, S., Iluz, D. and Levy, O. (2010). The spectral quality of light is a key driver of photosynthesis and photoadaptation in *Stylophora pistillata* colonies from different depths in the Red Sea. *J. Exp. Biol.* **213**, 4084-4091.
- McAuley, P. J. and Cook, C. B. (1994). Effects of host feeding and dissolved ammonium on cell division and nitrogen status of zooxanthellae in the hydroid *Myrionema amboinense*. *Mar. Biol.* **121**, 343-348.
- Mills, M. M., Lipschultz, F. and Sebens, K. P. (2004). Particulate matter ingestion and associated nitrogen uptake by four species of scleractinian corals. *Coral Reefs* **23**, 311-323.
- Morar, S. R., Bury, S. J., Wilkinson, S. P. and Davy, S. K. (2011). Sedimentary nitrogen uptake and assimilation in the temperate zooxanthellate sea anemone *Anthopleura aureoradiata*. *J. Exp. Mar. Biol. Ecol.* **399**, 110-119.
- Muscatine, L. and D'Elia, C. F. (1978). The uptake, retention, and release of ammonium by reef corals. *Limnol. Oceanogr.* **23**, 725-734.
- Muscatine, L., McCloskey, L. R. and Marian, R. E. (1981). Estimating the daily contribution of carbon from zooxanthellae to coral animal respiration. *Limnol. Oceanogr.* **26**, 601-611.
- Muscatine, L., Porter, J. W. and Kaplan, I. R. (1989). Resource partitioning by reef corals as determined from stable isotope composition. I.  $\delta^{13}\text{C}$  of zooxanthellae and animal tissue versus depth. *Mar. Biol.* **100**, 185-193.
- Palardy, J. E., Grottoli, A. G. and Matthews, K. (2005). Effects of upwelling, depth, morphology and polyp size on feeding in three species of Panamanian corals. *Mar. Ecol. Prog. Ser.* **300**, 79-89.
- Piniak, G. A. and Lipschultz, F. (2004). Effects of nutritional history on nitrogen assimilation in congeneric temperate and tropical scleractinian corals. *Mar. Biol.* **145** 1085-1096.
- Piniak, G. A., Lipschultz, F. and McClelland, J. (2003). Assimilation and partitioning of prey nitrogen within two anthozoans and their endosymbiotic zooxanthellae. *Mar. Ecol. Prog. Ser.* **262**, 125-136.
- Rahav, O., Dubinsky, Z., Achituv, Y. and Falkowski, P. G. (1989). Ammonium metabolism in the zooxanthellate coral, *Stylophora pistillata*. *Proc. R. Soc. Lond. B* **236**, 325-337.
- Rees, T. A. V. and Ellard, F. M. (1989). Nitrogen conservation and the green hydra symbiosis. *Proc. R. Soc. Lond. B* **236**, 203-212.

- Rodolfo-Metalpa, R., Richard, C., Allemand, D., Bianchi, C. N., Morri, C. and Ferrier-Pagès, C.** (2006). Response of zooxanthellae in symbiosis with the Mediterranean corals *Cladocora caespitosa* and *Oculina patagonica* to elevated temperatures. *Mar. Biol.* **150**, 45-55.
- Rodrigues, L. J. and Grottoli, A. G.** (2007). Energy reserves and metabolism as indicators of coral recovery from bleaching. *Limnol. Oceanogr.* **52**, 1874-1882.
- Santos, S. R., J., T. D., Kinzie, R. A., Hidaka, M., Sakai, K. and Coffroth, M. A.** (2002). Molecular phylogeny of symbiotic dinoflagellates inferred from partial chloroplast large subunit (23S)-rDNA sequences. *Mol. Phylogenet. Evol.* **23**, 97-111.
- Sebens, K. P.** (1981). The allometry of feeding, energetics, and body size in three sea anemone species. *Biol. Bull.* **161**, 152-171.
- Sebens, K. P. and Johnson, A. S.** (1991). Effects of water movement on prey capture and distribution of reef corals. *Hydrobiologia* **226**, 91-101.
- Sebens, K. P., Vandersall, K. S., Savina, L. A. and Graham, K. R.** (1996). Zooplankton capture by two scleractinian corals *Madracis mirabilis* and *Montastrea cavernosa* in a field enclosure. *Mar. Biol.* **127**, 303-317.
- Shyka, T.** (2000). Environmental influences on coral growth and nutrient acquisition. In *Marine Estuarine Environmental Sciences Program*, vol. MS Thesis, pp. 102. Maryland: University of Maryland, College Park.
- Shyka, T. A. and Sebens, K. P.** (2000). Community structure, water column nutrients, and water flow in two Pelican Cays ponds, Belize. *Atoll Res. Bull.* **471**, 105-121.
- Smith, D. C. and Douglas, A. E.** (1987). *The Biology of symbiosis*. London: Edward Arnold.
- Smith, P. K., Khrohn, R. I., Hermanson, G. T., Malia, A. K., Gartner, F. H., Provenzano, M. D., Fujimoto, E. K., Goeke, N. M., Olson, B. J. and Klenk, D. C.** (1985). Measurement of protein using bicinchoninic acid. *Anal. Biochem.* **150**, 76-85.
- Stimson, J. and Kinzie, R. A.** (1991). The temporal pattern and rate of release of zooxanthellae from the reef coral *Pocillopora damicornis* (Linnaeus) under nitrogen enrichment and control conditions. *J. Exp. Mar. Biol. Ecol.* **153**, 63-74.
- Szmant-Froelich, A.** (1981). Coral nutrition: comparison of the fate of  $^{14}\text{C}$  from ingested labeled brine shrimp and from the uptake of  $\text{NaH}^{14}\text{CO}_3$  by its zooxanthellae. *J. Exp. Mar. Biol. Ecol.* **55**, 133-144.
- Szmant, A. M.** (1997). Nutrient effects on coral reefs: the importance of topographic and trophic complexity on nutrient dynamics. *Proc. 8th Int. Coral Reef Symp.* **2**, 1527-1532.



**Tremblay, P., Peirano, A. and Ferrier-Pagès, C.** (2011). Heterotrophy in the Mediterranean symbiotic coral *Cladocora caespitosa*: comparison with two other scleractinian species. *Mar. Ecol. Prog. Ser.* **422**, 165-177.

**Tremblay, P., Grover, R., Maguer, J. F., Legendre, L. and Ferrier-Pagès, C.** (2012). Autotrophic carbon budget in the coral tissue: a new <sup>13</sup>C-based model of photosynthate translocation. *J. Exp. Biol.* **215**, 1384-1393.

**Tremblay, P., Grover, R., Maguer, J. F., Hoogenboom, M. and Ferrier-Pagès, C.** (2014). Carbon translocation from symbiont to host depends on irradiance and food availability in the tropical coral *Stylophora pistillata*. *Coral Reefs* **33**, 1-13.

**Underwood, A. J.** (1997). Experiments in ecology: their logical design and interpretation using analysis of variance. Cambridge, U.K.: Cambridge University Press.

**Veron, J. E. N.** (2000). Corals of the world Townsville: Australian Institute of Marine Science.

**Wangpraseurt, D., Larkum, A. W. D., Ralph, P. J. and Kühl, M.** (2012). Light gradients and optical microniches in coral tissues. *Front. Microbiol.* **3**, 316.

**Wangpraseurt, D., Larkum, A. W. D., Franklin, J., Szabó, M., Ralph, P. J. and Kühl, M.** (2014). Lateral light transfer ensures efficient resource distribution in symbiont-bearing corals. *J. Exp. Biol.* **217**, 489-498.

**Wiedenmann, J., D'Angelo, C., Smith, E. G., Hunt, A. N., Legiret, F.-E., Postle, A. D. and Achterberg, E. P.** (2013). Nutrient enrichment can increase the susceptibility of reef corals to bleaching. *Nature Clim. Change* **3**, 160–164.

**Wooldridge, S. A.** (2009). A new conceptual model for the warm-water breakdown of the coral-algae endosymbiosis. *Mar. Freshw. Res.* **60**, 483-496.

**Wooldridge, S. A.** (2013). Breakdown of the coral-algae symbiosis: towards formalising a linkage between warm-water bleaching thresholds and the growth rate of the intracellular zooxanthellae. *Biogeosciences* **10**, 1647-1658.



## FIGURES

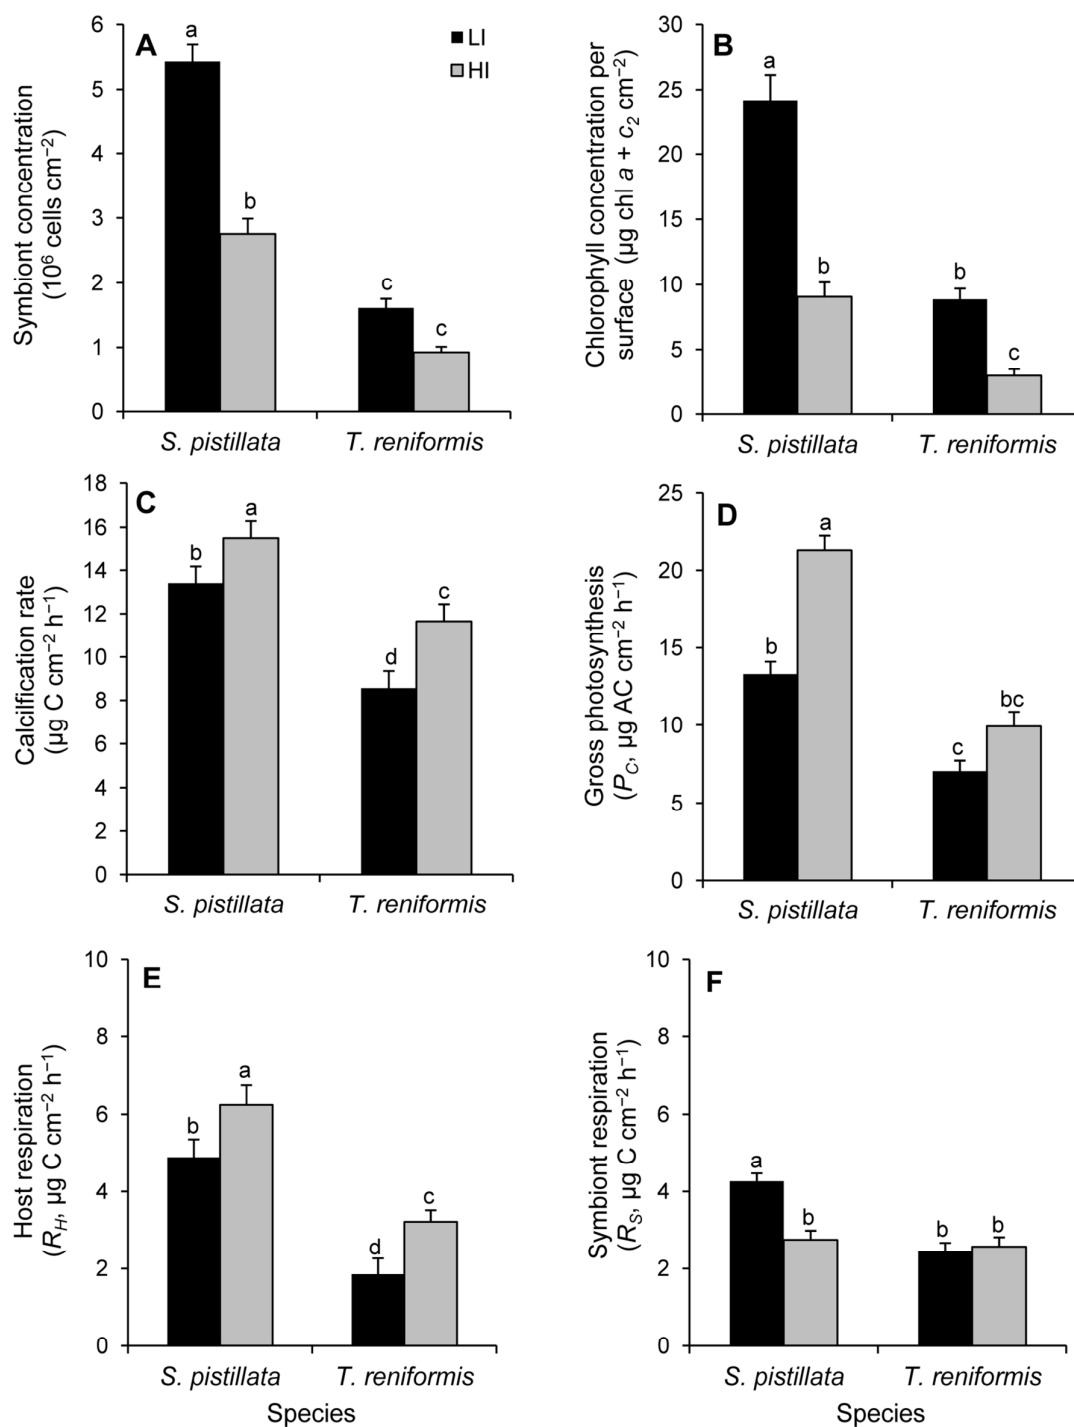

**Fig. 1. Effect of species and irradiance on the main physiological parameters.** (A) Symbiont concentration, (B) chlorophyll concentration, (C) calcification rate, (D) gross photosynthesis,  $P_C$ , (E) host respiration,  $R_H$ , and (F) symbiont respiration,  $R_S$ , per skeletal

surface for *Stylophora pistillata* (STP) and *Turbinaria reniformis* (TUR) maintained at low (LI) and high (HI) irradiance. Data are means  $\pm$  standard errors of the mean of  $n = 6$  measurements. For each fraction, bars with different letters (a to d) are significantly different ( $P < 0.05$ ).

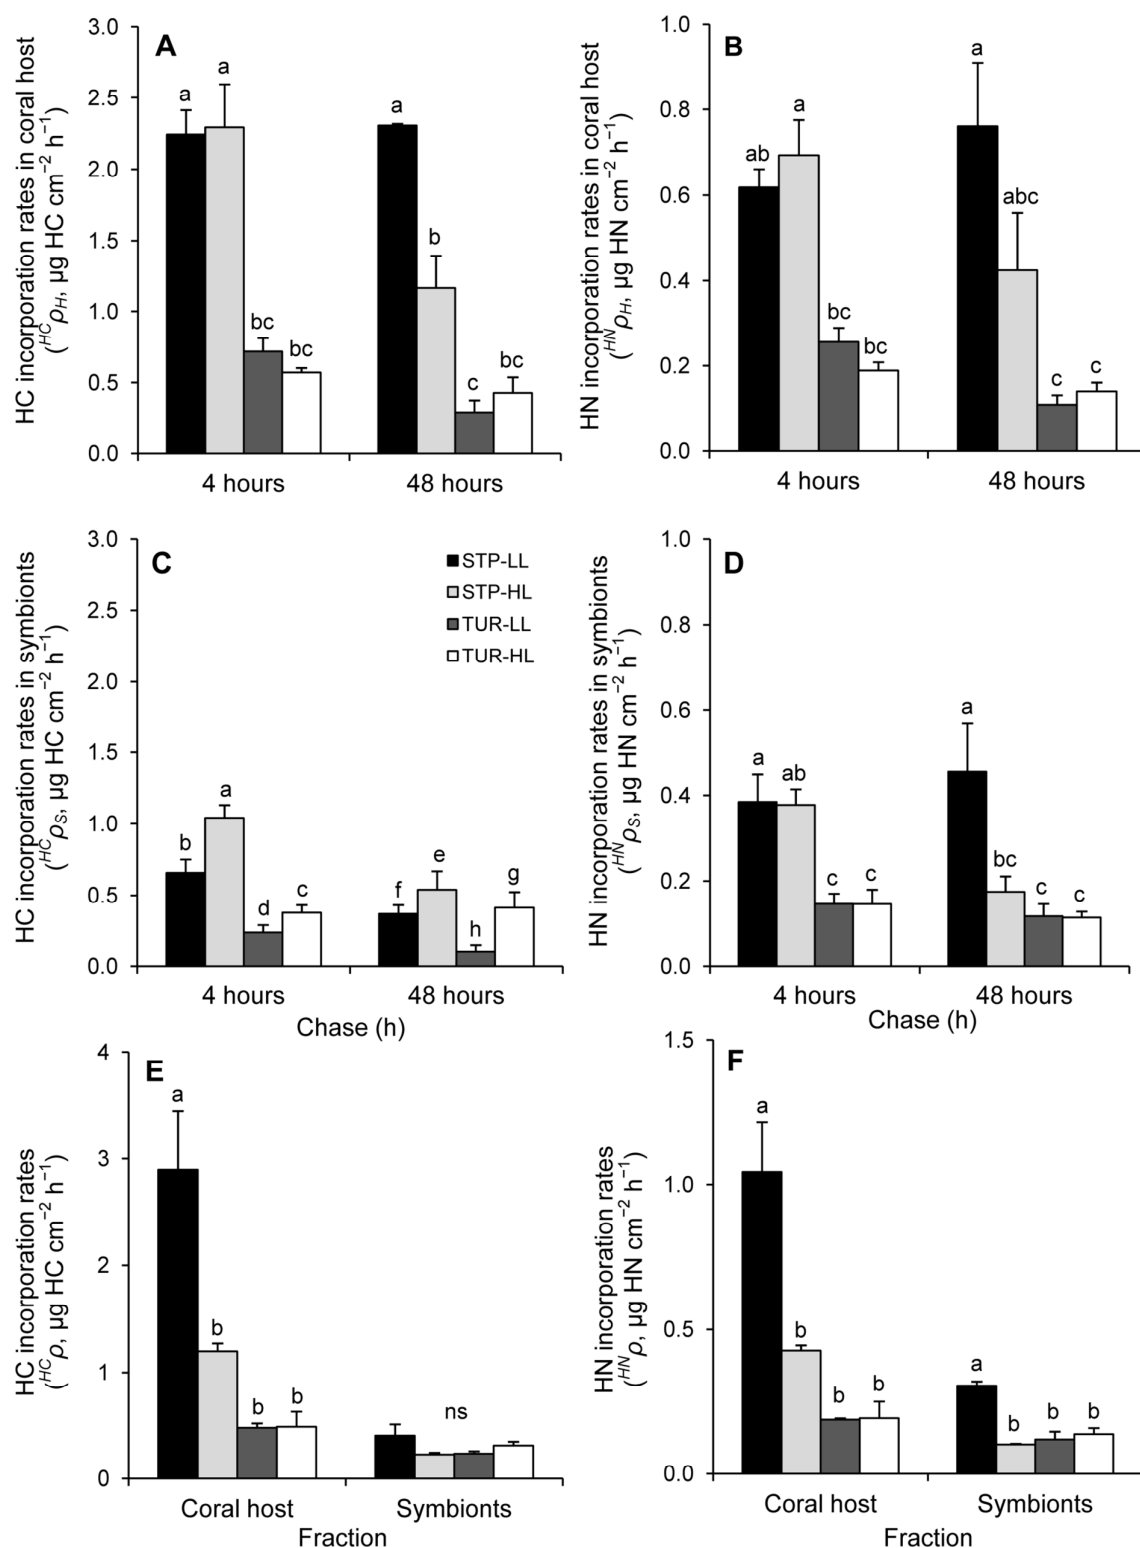

**Fig. 2. Effect of species and irradiance on the heterotrophic nutrient incorporation rates.** Heterotrophic (A) carbon ( $^{14}\text{C}$ ), and (B) nitrogen ( $^{15}\text{N}$ ) in coral host; and (C) carbon ( $^{14}\text{C}$ ), and (D) nitrogen ( $^{15}\text{N}$ ) in symbionts during short-term experiment. (E) Carbon ( $^{14}\text{C}$ ),

and (F) nitrogen ( $^{HN}\rho$ ) in coral host and symbionts during long-term experiment, for *Stylophora pistillata* (STP) and *Turbinaria reniformis* (TUR) maintained at low (LI) and high (HI) irradiance. Data are means  $\pm$  standard errors of the mean of  $n = 3$  measurements. For each fraction, bars with different letters (a to h) are significantly different ( $P < 0.05$ ); ns: no significant.

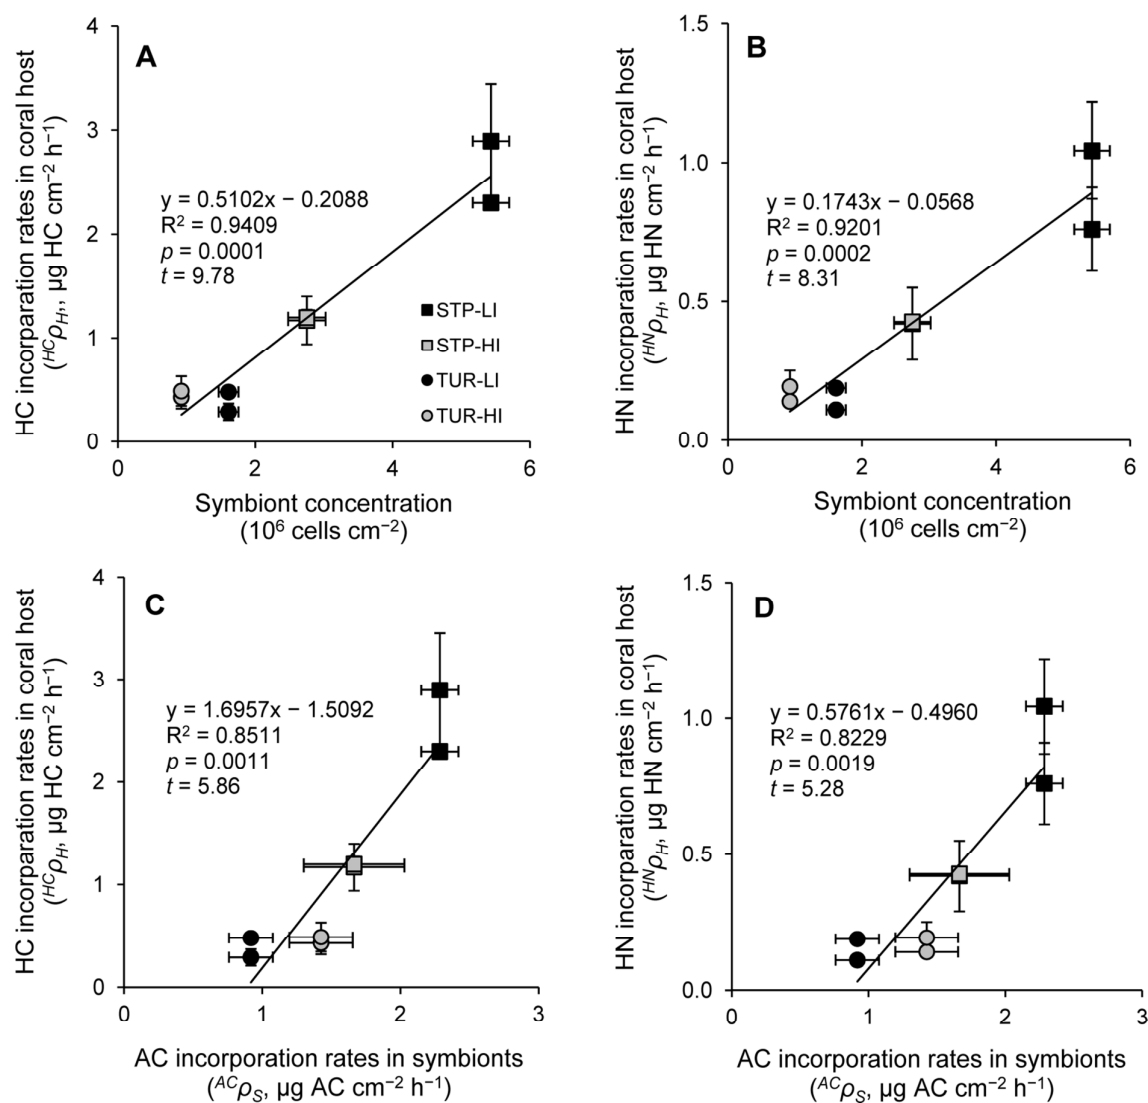

**Fig. 3. Relationship between symbiont population and heterotrophic nutrient incorporation rates in coral host.** Relationship between symbiont concentrations and incorporation rates in coral host of heterotrophic (A) carbon ( $^{HC}\rho_H$ ) or (B) nitrogen ( $^{HN}\rho_H$ ); and between autotrophic carbon incorporation rates in symbionts ( $^{AC}\rho_S$ ) and incorporation rates in coral host of heterotrophic (C) carbon ( $^{HC}\rho_H$ ) or (D) nitrogen ( $^{HN}\rho_H$ ), after 48 h during short-term experiment and during long-term experiment for *Stylophora pistillata* (STP) and *Turbinaria reniformis* (TUR) maintained at low (LI) and high (HI) irradiance. Data are means  $\pm$  standard errors of the mean of  $n = 3$  measurements for incorporation rates of nutrients, or  $n = 6$  measurements for symbionts concentration.

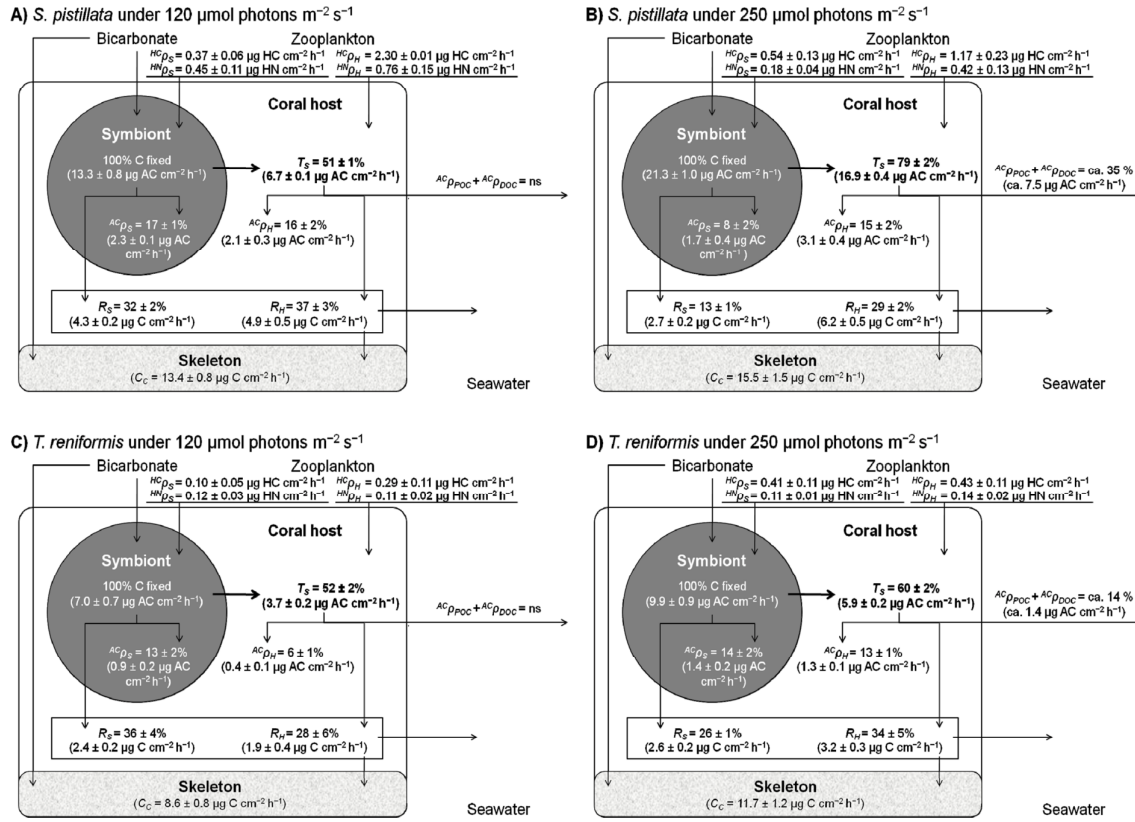

**Fig. 4. Mass-balanced results of photosynthate translocation and carbon budget.** Results for *Stylophora pistillata* maintained under (A) low and (B) high irradiance or *Turbinaria reniformis* maintained under (C) low and (D) high irradiance, based on  $^{13}\text{C}$  experiments after 48 h of incubation. Symbols are defined in List of symbols and abbreviations section and in the text. Data represent means and standard errors of  $n = 3$  measurements for  $\text{H}^{13}\text{CO}_3^-$ -based rates ( $^{13}\text{C}\rho_S$ ,  $^{13}\text{C}\rho_H$ ,  $^{13}\text{C}\rho_{POC} + ^{13}\text{C}\rho_{DOC}$ , and  $T_S$ ) and  $^{13}\text{C}/^{15}\text{N}$ -labeled prey-based rates ( $^{13}\text{C}\rho_S$ , and  $^{13}\text{C}\rho_H$ ), or  $n = 6$  measurements for rates of photosynthesis ( $P_C$ ), respiration ( $R_S$ , and  $R_H$ ) and calcification ( $C_C$ ).

## TABLES

Table 1. Physiological data normalised per symbiont cell ( $10^{-6} \mu\text{g chl } a + c_2 \text{ cell}^{-1}$ ,  $10^{-6} \mu\text{g C}$  or  $\text{N cell}^{-1} \text{ h}^{-1}$ ). Chlorophyll concentration, gross photosynthesis ( $P_C$ ), symbiont respiration ( $R_S$ ), heterotrophic carbon (HC,  $^{HC}\rho_S$ ), heterotrophic nitrogen (HN,  $^{HN}\rho_S$ ) and autotrophic carbon (AC,  $^{AC}\rho_S$ ) incorporation in symbionts as well as AC translocation ( $T_S$ ), after 48 h for *Stylophora pistillata* (STP) and *Turbinaria reniformis* (TUR) maintained at low (LI) and high (HI) irradiance. Data are means  $\pm$  standard errors of the mean of  $n = 3$  to 6 measurements. For each parameter, numbers with different letters (a to d) are significantly different ( $P < 0.05$ ); ns: not significant.

|                                    | <i>Stylophora pistillata</i> |       |           |      |       |           | <i>Turbinaria reniformis</i> |       |           |       |       |           |
|------------------------------------|------------------------------|-------|-----------|------|-------|-----------|------------------------------|-------|-----------|-------|-------|-----------|
|                                    | LI                           |       |           | HI   |       |           | LI                           |       |           | HI    |       |           |
|                                    | mean                         | $\pm$ | s.e.m.    | mean | $\pm$ | s.e.m.    | mean                         | $\pm$ | s.e.m.    | mean  | $\pm$ | s.e.m.    |
| Chlorophyll concentration          | 4.48                         | $\pm$ | 0.36 (a)  | 3.32 | $\pm$ | 0.35 (b)  | 5.52                         | $\pm$ | 0.55 (a)  | 3.11  | $\pm$ | 0.25 (b)  |
| Gross photosynthesis ( $P_C$ )     | 2.46                         | $\pm$ | 0.12 (a)  | 8.04 | $\pm$ | 0.87 (b)  | 4.45                         | $\pm$ | 0.38 (c)  | 10.82 | $\pm$ | 0.48 (d)  |
| Symbiont respiration ( $R_S$ )     | 0.78                         | $\pm$ | 0.10 (a)  | 1.00 | $\pm$ | 0.04 (b)  | 1.52                         | $\pm$ | 0.11 (c)  | 2.79  | $\pm$ | 0.42 (d)  |
| HC incorporation ( $^{HC}\rho_S$ ) | 0.12                         | $\pm$ | 0.05 (a)  | 0.20 | $\pm$ | 0.05 (b)  | 0.06                         | $\pm$ | 0.03 (a)  | 0.45  | $\pm$ | 0.12 (b)  |
| HN incorporation ( $^{HN}\rho_S$ ) | 0.08                         | $\pm$ | 0.02 (ns) | 0.06 | $\pm$ | 0.01 (ns) | 0.07                         | $\pm$ | 0.02 (ns) | 0.12  | $\pm$ | 0.02 (ns) |
| AC incorporation ( $^{AC}\rho_S$ ) | 0.42                         | $\pm$ | 0.02 (a)  | 0.60 | $\pm$ | 0.13 (a)  | 0.57                         | $\pm$ | 0.10 (a)  | 1.54  | $\pm$ | 0.25 (b)  |
| AC translocation ( $T_S$ )         | 1.24                         | $\pm$ | 0.02 (a)  | 6.13 | $\pm$ | 0.13 (b)  | 2.28                         | $\pm$ | 0.10 (c)  | 6.41  | $\pm$ | 0.25 (b)  |

Table 2. Results of the repeated measured analysis of variance (ANOVA) or factorial ANOVA testing the effect of species, irradiance and time on heterotrophic carbon (HC) and nitrogen (HN) incorporation rates ( $^{HC}\rho$  and  $^{HN}\rho$ ) in symbionts and coral host;  $n = 3$  replicates. Significant  $P$ -values are in **bold**.

| Factor                                                                                        | Symbionts |               |       | Coral host |                   |        |
|-----------------------------------------------------------------------------------------------|-----------|---------------|-------|------------|-------------------|--------|
|                                                                                               | d.f.      | $P$           | $F$   | d.f.       | $P$               | $F$    |
| <i>Heterotrophic carbon (HC) incorporation rates at short-term (<math>^{HC}\rho</math>)</i>   |           |               |       |            |                   |        |
| Between subjects                                                                              |           |               |       |            |                   |        |
| Species                                                                                       | 1         | <b>0.0011</b> | 34.44 | 1          | <b>&lt;0.0001</b> | 80.19  |
| Irradiance                                                                                    | 1         | <b>0.0068</b> | 16.28 | 1          | 0.1463            | 2.67   |
| Species $\times$ Irradiance                                                                   | 1         | 0.8351        | 0.47  | 1          | 0.1529            | 2.57   |
| Error                                                                                         | 6         | -             | -     | 7          | -                 | -      |
| Within subjects                                                                               |           |               |       |            |                   |        |
| Time                                                                                          | 1         | <b>0.0254</b> | 8.74  | 1          | <b>0.0005</b>     | 36.03  |
| Time $\times$ Species                                                                         | 1         | 0.0877        | 4.15  | 1          | 0.1117            | 3.31   |
| Time $\times$ Irradiance                                                                      | 1         | 0.9888        | <0.01 | 1          | <b>0.0118</b>     | 11.42  |
| Time $\times$ Species $\times$ Irradiance                                                     | 1         | 0.2258        | 1.82  | 1          | <b>0.0009</b>     | 29.82  |
| Error                                                                                         | 6         | -             | -     | 7          | -                 | -      |
| <i>Heterotrophic nitrogen (HN) incorporation rates at short-term (<math>^{HN}\rho</math>)</i> |           |               |       |            |                   |        |
| Between subjects                                                                              |           |               |       |            |                   |        |
| Species                                                                                       | 1         | <b>0.0006</b> | 29.61 | 1          | <b>0.0001</b>     | 51.086 |
| Irradiance                                                                                    | 1         | 0.1726        | 2.24  | 1          | 0.2735            | 1.3826 |
| Species $\times$ Irradiance                                                                   | 1         | 0.1839        | 2.12  | 1          | 0.3982            | 0.7965 |
| Error                                                                                         | 8         | -             | -     | 8          | -                 | -      |
| Within subjects                                                                               |           |               |       |            |                   |        |
| Time                                                                                          | 1         | <b>0.0090</b> | 11.73 | 1          | 0.1427            | 2.6419 |
| Time $\times$ Species                                                                         | 1         | 0.1041        | 3.36  | 1          | 0.7405            | 0.1176 |
| Time $\times$ Irradiance                                                                      | 1         | <b>0.0284</b> | 7.12  | 1          | 0.1502            | 2.5328 |
| Time $\times$ Species $\times$ Irradiance                                                     | 1         | <b>0.0321</b> | 6.71  | 1          | <b>0.0327</b>     | 6.6504 |
| Error                                                                                         | 8         | -             | -     | 8          | -                 | -      |
| <i>Heterotrophic carbon (HC) incorporation rates at long-term (<math>^{HC}\rho</math>)</i>    |           |               |       |            |                   |        |
| Species                                                                                       | 1         | 0.5357        | 0.42  | 1          | <b>0.0020</b>     | 22.95  |
| Irradiance                                                                                    | 1         | 0.4603        | 0.61  | 1          | <b>0.0360</b>     | 6.70   |
| Species $\times$ Irradiance                                                                   | 1         | 0.0919        | 3.81  | 1          | <b>0.0345</b>     | 6.85   |
| Error                                                                                         | 7         | -             | -     | 7          | -                 | -      |
| <i>Heterotrophic nitrogen (HN) incorporation rates at long-term (<math>^{HN}\rho</math>)</i>  |           |               |       |            |                   |        |
| Species                                                                                       | 1         | <b>0.0093</b> | 12.63 | 1          | <b>0.0012</b>     | 27.30  |
| Irradiance                                                                                    | 1         | <b>0.0032</b> | 19.24 | 1          | <b>0.0220</b>     | 8.58   |
| Species $\times$ Irradiance                                                                   | 1         | <b>0.0012</b> | 27.62 | 1          | <b>0.0206</b>     | 8.87   |
| Error                                                                                         | 7         | -             | -     | 7          | -                 | -      |
| <i>Ratio of HC:HN incorporation rates</i>                                                     |           |               |       |            |                   |        |
| Species                                                                                       | 1         | 0.7063        | 0.14  | 1          | <b>0.0066</b>     | 8.51   |
| Irradiance                                                                                    | 1         | <b>0.0002</b> | 17.93 | 1          | 0.7615            | 0.09   |
| Species $\times$ Irradiance                                                                   | 1         | 0.8418        | 0.04  | 1          | 0.0967            | 2.94   |
| Error                                                                                         | 29        | -             | -     | 30         | -                 | -      |



Table 3. Results of the repeated measured analysis of variance (ANOVA) testing the effect of species, irradiance and time on autotrophic carbon (AC) incorporation rates ( $^{AC}\rho$ ) and percentage of fixed carbon ( $C_R$ ) in the symbionts and coral host as well as amount and percentage of carbon lost ( $C_L$ ) and translocated ( $T_S$ );  $n = 3$  replicates. Significant  $P$ -values are in **bold**.

| Factor                                                                                                                                   | d.f. | Amount ( $\mu\text{g C cm}^{-2} \text{ h}^{-1}$ ) |          | Percentage (%)    |          |
|------------------------------------------------------------------------------------------------------------------------------------------|------|---------------------------------------------------|----------|-------------------|----------|
|                                                                                                                                          |      | <i>P</i>                                          | <i>F</i> | <i>P</i>          | <i>F</i> |
| <i>Autotrophic carbon (AC) incorporation rate (<math>^{AC}\rho_S</math>) and fixed carbon remaining (<math>C_R</math>) in symbionts</i>  |      |                                                   |          |                   |          |
| Between subjects                                                                                                                         |      |                                                   |          |                   |          |
| Species                                                                                                                                  | 1    | <b>&lt;0.0001</b>                                 | 73.40    | 0.6200            | 0.27     |
| Irradiance                                                                                                                               | 1    | 0.5799                                            | 0.33     | <b>0.0022</b>     | 19.48    |
| Species $\times$ Irradiance                                                                                                              | 1    | <b>0.0012</b>                                     | 24.13    | <b>0.0007</b>     | 28.14    |
| Error                                                                                                                                    | 8    | -                                                 | -        | -                 | -        |
| Within subjects                                                                                                                          |      |                                                   |          |                   |          |
| Time                                                                                                                                     | 2    | <b>&lt;0.0001</b>                                 | 22.79    | <b>&lt;0.0001</b> | 23.05    |
| Time $\times$ Species                                                                                                                    | 2    | 0.1059                                            | 2.59     | 0.7812            | 0.25     |
| Time $\times$ Irradiance                                                                                                                 | 2    | 0.9608                                            | 0.04     | 0.4719            | 0.79     |
| Time $\times$ Species $\times$ Irradiance                                                                                                | 2    | 0.6763                                            | 0.40     | 0.5048            | 0.71     |
| Error                                                                                                                                    | 16   | -                                                 | -        | -                 | -        |
| <i>Autotrophic carbon (AC) incorporation rate (<math>^{AC}\rho_H</math>) and fixed carbon remaining (<math>C_R</math>) in coral host</i> |      |                                                   |          |                   |          |
| Between subjects                                                                                                                         |      |                                                   |          |                   |          |
| Species                                                                                                                                  | 1    | <b>&lt;0.0001</b>                                 | 78.16    | <b>0.0258</b>     | 7.46     |
| Irradiance                                                                                                                               | 1    | <b>0.0128</b>                                     | 10.19    | 0.5823            | 0.33     |
| Species $\times$ Irradiance                                                                                                              | 1    | 0.4248                                            | 0.71     | 0.1955            | 2.00     |
| Error                                                                                                                                    | 8    | -                                                 | -        | -                 | -        |
| Within subjects                                                                                                                          |      |                                                   |          |                   |          |
| Time                                                                                                                                     | 2    | <b>0.0435</b>                                     | 3.84     | <b>0.0424</b>     | 3.87     |
| Time $\times$ Species                                                                                                                    | 2    | <b>0.0226</b>                                     | 4.85     | <b>0.0247</b>     | 4.71     |
| Time $\times$ Irradiance                                                                                                                 | 2    | 0.5018                                            | 0.72     | 0.2175            | 1.68     |
| Time $\times$ Species $\times$ Irradiance                                                                                                | 2    | 0.9141                                            | 0.09     | 0.4987            | 0.73     |
| Error                                                                                                                                    | 16   | -                                                 | -        | -                 | -        |
| <i>Autotrophic carbon (AC) translocation (<math>T_S</math>)</i>                                                                          |      |                                                   |          |                   |          |
| Between subjects                                                                                                                         |      |                                                   |          |                   |          |
| Species                                                                                                                                  | 1    | <b>&lt;0.0001</b>                                 | 371.75   | <b>0.0004</b>     | 33.94    |
| Irradiance                                                                                                                               | 1    | <b>&lt;0.0001</b>                                 | 349.33   | <b>&lt;0.0001</b> | 192.47   |
| Species $\times$ Irradiance                                                                                                              | 1    | <b>&lt;0.0001</b>                                 | 157.62   | <b>&lt;0.0001</b> | 77.11    |
| Error                                                                                                                                    | 8    | -                                                 | -        | -                 | -        |
| Within subjects                                                                                                                          |      |                                                   |          |                   |          |
| Time                                                                                                                                     | 2    | <b>&lt;0.0001</b>                                 | 22.79    | <b>&lt;0.0001</b> | 23.05    |
| Time $\times$ Species                                                                                                                    | 2    | 0.1059                                            | 2.59     | 0.7812            | 0.25     |
| Time $\times$ Irradiance                                                                                                                 | 2    | 0.9608                                            | 0.04     | 0.4719            | 0.79     |
| Time $\times$ Species $\times$ Irradiance                                                                                                | 2    | 0.6763                                            | 0.401    | 0.5048            | 0.71     |
| Error                                                                                                                                    | 16   | -                                                 | -        | -                 | -        |
| <i>Autotrophic carbon (AC) lost (<math>C_L</math>)</i>                                                                                   |      |                                                   |          |                   |          |
| Between subjects                                                                                                                         |      |                                                   |          |                   |          |
| Species                                                                                                                                  | 1    | <b>&lt;0.0001</b>                                 | 269.75   | 0.2126            | 1.83     |
| Irradiance                                                                                                                               | 1    | <b>&lt;0.0001</b>                                 | 208.94   | 0.0304            | 6.89     |
| Species $\times$ Irradiance                                                                                                              | 1    | <b>&lt;0.0001</b>                                 | 90.52    | <b>0.0071</b>     | 12.85    |
| Error                                                                                                                                    | 8    | -                                                 | -        | -                 | -        |
| Within subjects                                                                                                                          |      |                                                   |          |                   |          |
| Time                                                                                                                                     | 2    | <b>0.0002</b>                                     | 15.95    | <b>0.0001</b>     | 16.78    |
| Time $\times$ Species                                                                                                                    | 2    | <b>0.0375</b>                                     | 4.06     | 0.0901            | 2.81     |
| Time $\times$ Irradiance                                                                                                                 | 2    | 0.6384                                            | 0.46     | 0.1892            | 1.85     |
| Time $\times$ Species $\times$ Irradiance                                                                                                | 2    | 0.9690                                            | 0.03     | 0.7502            | 0.29     |
| Error                                                                                                                                    | 16   | -                                                 | -        | -                 | -        |
